# Supplementary material for: Evaluation of the implementation of patient decision aid: A mixed-method study
Source: Research Square preprint supplement (doi:10.21203/rs.3.rs-2839890/v1), 2023-04-27
Supplement: Supplementary file 1 [file 5ceae4f67a0f4a93c0c68f30.docx]

**Fidelity checklist**

1. Did the doctor make a note in the patient’s electronic medical record (EMR) to indicate PDA has been given?
2. Did the doctor provide an appointment (≤ 3 months) to the patient for PDA follow-up?
3. Did the doctor make a note in patient’s appointment book that PDA was given?
4. Did the clerk enter notes in the EMR ‘Remark’ section as indicated by doctor in the patient’s appointment book?
5. Did the doctor follow-up with patient on the PDA use?

**Characteristics of doctors who participated in the insulin PDA implementation**

| **Characteristic (n=48)** | **Mean ± SD (Range)** |
| --- | --- |
| **Age (years)** | 33.5 ± 3.1 (28-50) |
| **Years of practice since graduation (years)** | 1.86 ± 1.44 (3 month – 7) |
| **No of patient counseled on insulin initiation for the past one month** | 9.9 ± 7.54 (1-30) |
|  | **n (%)** |
| **Sex** |  |
| Male | 13 (27.1) |
| Female | 35 (72.9) |
| **Ethnicity** |  |
| Malay | 20 (41.7) |
| Chinese | 21 (43.8) |
| Indian | 4 (8.3) |
| Others | 3 (6.3) |
| **Current year of study (n=47)** |  |
| Year 1 | 9 (19.1) |
| Year 2 | 14 (29.8) |
| Year 3 | 16 (34.0) |
| Year 4 | 8 (17.0) |

SD: standard deviation

**Characteristics of HCPs and patients who participated in the qualitative interviews**

|  | **HCP**  **(n=43)** | **Patient**  **(n=62)** |
| --- | --- | --- |
| **Age (years)**  Mean ± SD (Range) | 34.1 ± 4.9  (28-50) | 58.0 ± 12.1  (26-83) |
| **Years of practice since graduation**  Mean ± SD (Range) | 2.6 ± 3.7  (3 months – 20 years) | n.a |
| **No of patient counseled on insulin initiation for the past one month**  Mean ± SD (Range) | 10.5 ± 7.8  (1-30) | n.a |
| **Duration of diabetes** (years)  Mean ± SD (Range) | n.a | 12.4 ± 8.7  (1-35) |
| **Duration of seeking treatment at the study clinic** (years)  Mean ± SD (Range) | n.a | 8.1 ± 6.7  (6 months – 30) |
|  | **n (%)** | **n (%)** |
| **Sex** |  |  |
| Male | 11 (25.6) | 30 (48.4) |
| Female | 32 (74.4) | 32 (51.6) |
| **Ethnicity** |  |  |
| Malay | 23 (53.5) | 27 (43.5) |
| Chinese | 14 (32.6) | 13 (21.0) |
| Indian | 4 (9.3) | 19 (30.6) |
| Others | 2 (4.7) | 3 (4.8) |
| **Highest education level** |  |  |
| Primary | 0 | 6 (9.7) |
| Secondary | 0 | 32 (51.6) |
| Diploma | 5 (11.6) | 9 (14.5) |
| Tertiary | 38 (88.4) | 15 (24.2) |
| **Position** |  |  |
| Healthcare policymaker | 3 (7.0) | n.a |
| Doctor | 35 (81.4) | n.a |
| Staff nurse | 5 (11.6) | n.a |
| **Occupation** |  |  |
| Manager / professional | n.a | 12 (19.4) |
| Skilled worker | n.a | 7 (11.3) |
| Semi-skilled worker | n.a | 19 (30.6) |
| Low-skilled worker | n.a | 2 (3.2) |
| Housewife / Not working | n.a | 22 (35.5) |
| **Insulin PDA use during implementation period (Doctors only) (n=35)** |  |  |
| Yes | 41 (95.3) | n.a |
| No | 2 (4.7) | n.a |

SD: standard deviation; n.a: not applicable
